# Supplementary material for: Freshwater sponges in the southeastern U.S. harbor unique microbiomes that are influenced by host and environmental factors
Source: PeerJ. 2025 Jan 30;13:e18807. doi: 10.7717/peerj.18807 (PMC11787800; doi:10.7717/peerj.18807)
Supplement: Supplemental Information 3 — The top BLAST result with the coverage and percent identity to the NCBI sequence is reported for each sponge sequence of 18S rRNA and cytochrome oxidase 1 (COI). [file peerj-13-18807-s003.xlsx]

## Sheet: Sheet1
Sample ID	Date Collected	18S and ITS primer set	COI primer set
NR5	2017-07-12	Racekiela cresciscrystae (Query Cover 96%; %ID 99.13%)	Did not amplify
NR6	September 4 2017	Racekiela monetmflumina (Query Cover 95%; % ID 98.59%)	Did not amplify
NR8	2017-07-12	Eunapius sp. BW0114 (Query Cover 100%; % ID 97.41%) ; Eunapius sp. JP9 (Query Cover 100%; % ID 96.37%)	Did not amplify
NR10	2017-08-26	Did not amplify	Ephydatia muelleri (Query Cover 100%; % ID 100%); Ephydatia fluviatilis (Query Cover 100%; % ID 99.83% )
NR17	2017-08-26	Radiospongilla crateriformis (Query Cover 92%; % ID 97.80%); Radiospongilla crateriformis (Query Cover 92%; % ID 97.80%)	Did not amplify
NR13	2017-08-26	Did not amplify	Ephydatia muelleri (Query Cover 100%; % ID 100%); Ephydatia fluviatilis (Query Cover 100%; % ID 99.82%)
JF21	November 21 2017	Radiospongilla crateriformis (Query Cover 100%; % ID 97.71%)	Did not amplify
JF22	November 21 2017	Racekiela cresciscrystae (Query Cover 75%; %ID 99.71%); Ephydatia sp. VI- 2010 (Query Cover 99%; % ID 90.66	Did not amplify
JF23	November 21 2017	No significant matches	Eunapius fragilis (Query Cover 100%; % ID 100%); Eunapius carteri (Query Cover 100%; % ID 99.66%)
JF24	November 21 2017	Did not amplify	Ephydatia muelleri (Query Cover 100%; % ID 100%); Ephydatia fluviatilis (Query Cover 100%; % ID 99.82%)
Ha1	September 18 2017	Did not amplify	Ephydatia muelleri (Query Cover 99%; % ID 100%); Ephydatia fluviatilis (Query 99%; % ID 99.82%)
Ha2	September 18 2017	Did not amplify	Spongilla lacustris (Query Cover 100%; % ID 99.27%); Ephydatia muelleri (Query Cover 100%; % ID 98.91%)
Ha3	September 18 2017	Did not amplify	Trochospongilla pennsylvanica (Query Cover 99%; % ID 100%); Spongilla lacustris Query Cover 100%; % ID 99.82%
Ha4	September 18 2017	Did not amplify	Trochospongilla pennsylvanica (Query Cover 100%; % ID 100%); Spongilla lacustris (Query Cover 100%; % ID 98.90%)
Ha4b - technical replicate	September 18 2017	Radiospongilla crateriformis (Query Cover 90%; % ID 97.20%)	Did not amplify
Ha6	September 18 2017	Racekiela cresciscrystae (Query Cover 75%; %ID 99.71%); Ephydatia sp. VI- 2010 (Query Cover 99%; % ID 90.72)	Did not amplify
Ha7	September 18 2017	Trochospongilla latouchiana (Query Cover 100%; % ID 82.69; E-value 9e-95); Radiospongilla crateriformis (Query Cover 100%; % ID 81.76%)	Did not amplify
