# Supplementary material for: Freshwater sponges in the southeastern U.S. harbor unique microbiomes that are influenced by host and environmental factors
Source: PeerJ. 2025 Jan 30;13:e18807. doi: 10.7717/peerj.18807 (PMC11787800; doi:10.7717/peerj.18807)
Supplement: Supplemental Information 4 — Sponge marker gene sequence for 18S rRNA gene and cytochrome oxidase 1 (COI) genes. Samples that did not amplify successfully are noted as not available. [file peerj-13-18807-s004.xlsx]

## Sheet: Sheet1
Sample ID	18S and ITS primer set	COI primer set
NR5	GAACCTGCGGAAGGATCATTACCGTACCATTTCGGGGGATTCGTTTTCCCTGGATCCACTGTGCACTAGGCTGCGGCCCGCCAGGAGCCGCGTTTGGGGAGGTCGCCCTCGGGTGCGAGGTCGACGCGAGTCGGCGAGAGAGATCCCTCTGCCGGCCTCTCCGACGCGGTTCCAGGGCCGCAGTTCTTATTATTTTTTTTCTCACGAACCGTGGAGTTACCAACGGGTCTAGTTTCGTTTCGTTTGTCGAGGAGACAACGTAAAAAAGTTGAGACAACTTCTAACGGTGGACCCCTCGGCTCGTGCGTCGATGAAGAACGCAGCAAACTGCGATACGTAGTGTGAATTGCAGAATTCCGTGAATCATCGAGTCTTTGAACGCAAATTGCGCCCTCGGTT…	Not available
NR6	CCTGCGGAAGGATCATTACCGTACCATTTCGGGGGATTCGTTTTCCCTGGATCCACTGTGCACTAGGCTGCGGCCCGCCGGAGCCGCGTTTGGGGAGGTCGCCCTCGGGTGCGAGGTCGACGCGAGTCGGCGAGAGAGATCCCTCCGCCGGCCTCTCCGACGCGGTTCCAGGGCCGCAGTTCTTATAATTTTTTTTCTCACGAACCGTGGAGTTACCAACGGGTCTAGTTTCGTTTCGTTTGTCGAGGAGACAACGTAAAAAAGTTGAGACAACTTCTAACGGTGGACCCCTCGGCTCGTGCGTCGATGAAGAACGCAGCAAACTGCGATACGTAGTGTGAATTGCAGAATTCCGTGATTCATCTAGTCTTTGAACGCTAATTGCGCCCTCTGTTTGAA…	Not available
NR8	GAACCTGCGGAAGGATCATTACCGTACAATTTCGGGGATTTTCTTCCCTGGATCCACTGTGCACCAGGCTGCGGCCCGCTATGCCGCGTTTTGGGGAGGTATGGCCCTCGGGCCGTCCTCCCCGACGCGGTGGGCCGCAGTTCTTAAACTTTATTTTCGAACTCGAGCGGACCGAACGGGTATCTTTTTTTT	Not available
NR10	Not available	TGTTAGGGGATGATCAATTATATAATGTTATAGTTACAGCCCATGCTTTTCTAATGATATTTTTCTTAGTTATGCCAGTAATGATTGGGGGATTTGGAAATTGATTCGTGCCATTATATATTGGTGCACCCGATATGGCTTTTCCAAGATTAAACAATATTAGTTTTTGATTATTACCTCCGGCTTTAACTCTATTATTAGGATCTGCTTTTGTAGAGCAAGGGGTTGGTACAGGATGGACAGTATATCCCCCTTTAGCAGGCATACAAGCGCATTCTGGGGGATCGGTTGATATGGCAATATTTAGTCTTCACTTGGCGGGTATTTCTTCGATATTAGGGGCTATGAATTTTATCACAACAATCTTTAATATGAGAGCGCCCGGTATTACAATGGATA…
NR17	ATTTAGAGGAAGTAAAAGTCGTAACAAGGTTTCCGTAGGTGAACCTGCGGAAGGATCATTACCGTACCGTTTCGGGGAATTCGTTCCCTCGATCCACTGTGCACTAGGCTGCGGCCCGCCAAAGCCGCGTCGGGGAGGTCGTTCTCGGGTGCGAGGACGACGCGAGTCGGCGCGAGAGAACCCTCCGCCGGCCTCTCCGACGCGGAGGGCCGCAGTTCTCGCTCTTTTTTTTCTCGAACCGTAGCGTACCGAACGGGTTGCTGTTTTTATCGTATTGTCGAGGAGACAACGTATAAAAGTTTGAGACAACTTCTAACGGTGGACCCCTCGGCTCGTGCGTCGATGAAGAACGCAGCAAACTGCGATACGTAGTGTGAATTGCAGAATTCCGTGAATCAT…	ATTTAGAGGAAGTAAAAGTCGTAACAAGGTTTCCGTAGGTGAACCTGCGGAAGGATCATTACCGTACCGTTTCGGGGAATTCGTTCCCTCGATCCACTGTGCACTAGGCTGCGGCCCGCCAAAGCCGCGTCGGGGAGGTCGTTCTCGGGTGCGAGGACGACGCGAGTCGGCGCGAGAGAACCCTCCGCCGGCCTCTCCGACGCGGAGGGCCGCAGTTCTCGCTCTTTTTTTTCTCGAACCGTAGCGTACCGAACGGGTTGCTGTTTTTATCGTATTGTCGAGGAGACAACGTATAAAAGTTTGAGACAACTTCTAACGGTGGACCCCTCGGCTCGTGCGTCGATGAAGAACGCAGCAAACTGCGATACGTAGTGTGAATTGCAGAATTCCGTGAATCAT…
NR13	Not available	CCCATGCTTTTCTAATGATATTTTTCTTAGTTATGCCAGTAATGATTGGGGGATTTGGAAATTGATTCGTGCCATTATATATTGGTGCACCCGATATGGCTTTTCCAAGATTAAACAATATTAGTTTTTGATTATTACCTCCGGCTTTAACTCTATTATTAGGATCTGCTTTTGTAGAGCAAGGGGTTGGTACAGGATGGACAGTATATCCCCCTTTAGCAGGCATACAAGCGCATTCTGGGGGATCGGTTGATATGGCAATATTTAGTCTTCACTTGGCGGGTATTTCTTCGATATTAGGGGCTATGAATTTTATCACAACAATCTTTAATATGAGAGCGCCCGGTATTACAATGGATAGACTGCCATTATTTGTATGATCTATTTTAATAACAGCCT…
JF21	GGTGAACCTGCGGAAGGATCATTACCGTACCGTTTCGGGGAATTCGTTCCCTCGATCCACTGTGCACTAGGCTGCGGCCCGCCAAAGCCGCGTCGGGGAGGTCGTTCTCGGGTGCGAGGACGACGCGAGTCGGCGCGAGAGAACCCTCCGCCGGCCTCTCCGACGCGGAGGGCCGCAGTTCTCGCTCTTTTTTTTCTCGAACCGTAGCGTACCGAACGGGTTGCTGTTTTTATCGTATTGTCGAGGAGACAACGTATAAAAGTTTGAGACAACTTCTAACGGTGGACCCCTCGGCTCGTGCGTCGATGAAGAACGCAGCAAACTGCGATACGTAGTGTGAATTGCAGAATTCCGTGAATCATCGAGTCTTTGAACGCAAATTGCGCCCTCGGTTCGAAG…
JF22	GTGAACCTGCGGAAGGATCATTACCGTACCATTTCGGGGGATTCGTTTTCCCTGGATCCACTGTGCACTAGGCTGCGGCCCGCCAGGAGCCGCGTTTGGGGAGGTCGCCCTCGGGTGCGAGGTCGACGCGAGTCGGCGAGAGAGATCCCTCTGCCGGCCTCTCCGACGCGGTTCCAGGGCCGCAGTTCTTATTATTTTTTTTCTCACGAACCGTGGAGTTACCAACGGGTCTAGTTTCGTTTCGTTTGTCGAGGAGACAACGTAAAAAAGTTGAGACAACTTCTAACGGTGGACCCCTCGGCTCGTGCGTCGATGAAGAACGCAGCAAACTGCGATACGTAGTGTGAATTGCAGAATTCCGTGAATCATCGAGTCTTTGAACGCAAATTGCGCCCTCGG…	Not available
JF23	ACCTGCGGAAGGATCATTACCGTCTGTTCTCGGGGATCTCGATCCCTGCGATCCACCGTGCACTAGGCTGCGGCCCGCCACGCCGCGTCGGGGAGGTCGCCCTCGGGTCAAGAGGGTGACGCAAGTCGGCGAGAGAGATCCCCTCGCCGGCCTCCCCGTCGCGGAGGGCCGCAGTTCTCTATTCCATTTTTTTTTCCAACCCTGGAATACCCCCACCGGGTGGCCTTCCGGTTCCCTTTCCTGGCA	TGTTAGGGGATGATCAATTATATAATGTTATAGTTACAGCCCATGCTTTTCTAATGATATTTTTCTTAGTTATGCCAGTAATGATTGGGGGATTTGGAAATTGATTCGTGCCATTATATATTGGTGCACCCGATATGGCTTTTCCAAGATTAAACAATATTAGTTTTTGATTATTACCTCCGGCTTTAACTCTATTATTAGGATCTGCTTTTGTAGAGCAAGGGGTTGGTACCGGATGGACAGTATACCCCCCTTTAGCAGGCATACAAGCACATTCTGGGGGATCAGTTGATATGGCAATATTTAGTCTTCACTTGGCGGGTATTTCTTCGATATTAGGGGCTATGAATTTTATCACAACAATCTTTAATATGAGAGCGCCTGGTATTACAATGGATA…
JF24	Not available	CCATGCTTTTCTAATGATATTTTTCTTAGTTATGCCAGTAATGATTGGGGGATTTGGAAATTGATTCGTGCCATTATATATTGGTGCACCCGATATGGCTTTTCCAAGATTAAACAATATTAGTTTTTGATTATTACCTCCGGCTTTAACTCTATTATTAGGATCTGCTTTTGTAGAGCAAGGGGTTGGTACAGGATGGACAGTATATCCCCCTTTAGCAGGCATACAAGCGCATTCTGGGGGATCGGTTGATATGGCAATATTTAGTCTTCACTTGGCGGGTATTTCTTCGATATTAGGGGCTATGAATTTTATCACAACAATCTTTAATATGAGAGCGCCCGGTATTACAATGGATAGACTGCCATTATTTGTATGATCTATTTTAATAACAGCCTT…
Ha1	Not available	CCATGCTTTTCTAATGATATTTTTCTTAGTTATGCCAGTAATGATTGGGGGATTTGGAAATTGATTCGTGCCATTATATATTGGTGCACCCGATATGGCTTTTCCAAGATTAAACAATATTAGTTTTTGATTATTACCTCCGGCTTTAACTCTATTATTAGGATCTGCTTTTGTAGAGCAAGGGGTTGGTACAGGATGGACAGTATATCCCCCTTTAGCAGGCATACAAGCGCATTCTGGGGGATCGGTTGATATGGCAATATTTAGTCTTCACTTGGCGGGTATTTCTTCGATATTAGGGGCTATGAATTTTATCACAACAATCTTTAATATGAGAGCGCCCGGTATTACAATGGATAGACTGCCATTATTTGTATGATCTATTTTAATAACAGCCTT…
Ha2	Not available	CCATGCTTTTCTAATGATATTTTTCTTAGTTATGCCAGTAATGATTGGGGGATTTGGAAATTGATTCGTGCCATTATATATTGGTGCACCCGATATGGCTTTTCCAAGATTAAACAATATTAGTTTTTGATTATTACCTCCGGCTTTAACTCTATTATTAGGATCTGCTTTTGTAGAGCAAGGGGTTGGTACAGGATGGACAGTATATCCACCTTTAGCAGGTATACAAGCACATTCTGGGGGATCAGTTGATATGGCAATATTTAGTCTTCACTTGGCGGGTATTTCTTCGATATTAGGGGCTATGAATTTTATCACAACAATCTTTAATATGAGAGCGCCCGGTATTACAATGGATAGAATGCCATTATTTGTATGATCTATTTTAATAACAGCCTT…
Ha3	Not available	CCCATGCTTTTCTAATGATATTTTTCTTAGTTATGCCAGTAATGATTGGGGGATTTGGAAATTGATTCGTGCCACTATATATTGGTGCACCCGATATGGCTTTTCCAAGATTAAATAATATTAGTTTTTGATTATTACCTCCGGCTTTAACTCTATTATTAGGATCTGCTTTTGTAGAGCAAGGGGTTGGTACAGGATGGACAGTATATCCCCCTTTAGCAGGGATACAAGCACATTCTGGGGGATCAGTTGATATGGCAATATTTAGTCTTCACTTGGCGGGTATTTCTTCGATATTAGGGGCTATGAATTTTATCACTACAATCTTTAATATGAGAGCGCCCGGTATTACAATGGATAGAATGCCATTATTTGTATGATCTATTTTAATAACAGCCT…
Ha4	Not available	CAGCCCATGCTTTTCTAATGATATTTTTCTTAGTTATGCCAGTAATGATTGGGGGATTTGGAAATTGATTCGTGCCACTATATATTGGTGCACCCGATATGGCTTTTCCAAGATTAAATAATATTAGTTTTTGATTATTACCTCCGGCTTTAACTCTATTATTAGGATCTGCTTTTGTAGAGCAAGGGGTTGGTACAGGATGGACAGTATATCCCCCTTTAGCAGGGATACAAGCACATTCTGGGGGATCAGTTGATATGGCAATATTTAGTCTTCACTTGGCGGGTATTTCTTCGATATTAGGGGCTATGAATTTTATCACTACAATCTTTAATATGAGAGCGCCCGGTATTACAATGGATAGAATGCCATTATTTGTATGATCTATTTTAATAACAG…
Ha4b - technical replicate	CCTGCGGAAGGATCATTACCGTACCGTTTCGGGGAATTCGTTCCCTCGATCCACTGTGCACTAGGCTGCGGCCCGCCAAAGCCGCGTCGGGGAGGTCGTTCTCGGGTGCGAGGACGACGCGAGTCGGCGCGAGAGAACCCTCCGCCGGCCTCTCCGACGCGGAGGGCCGCAGTTCTCGCTCTTTTTTTTCTCGAACCGTAGCGTACCGAACGGGTTGCTGTTTTTATCGTATTGTCGAGGAGACAACGTATAAAAGTTTGAGACAACTTCTAACGGTGGACCCCTCGGCTCGTGCGTCGATGAAGAACGCAGCAAACTGCGATACGTAGTGTGAATTGCAGAATTCCGTGAATCATCGAGTCTTTGAACGCAAATTGCGCCCTCGGTTCGAAGCCGGGG…	Not available
Ha6	ACCTGCGGAAGGATCATTACCGTACCATTTCGGGGGATTCGTTTTCCCTGGATCCACTGTGCACTAGGCTGCGGCCCGCCAGGAGCCGCGTTTGGGGAGGTCGCCCTCGGGTGCGAGGTCGACGCGAGTCGGCGAGAGAGATCCCTCTGCCGGCCTCTCCGACGCGGTTCCAGGGCCGCAGTTCTTATTATTTTTTTTCTCACGAACCGTGGAGTTACCAACGGGTCTAGTTTCGTTTCGTTTGTCGAGGAGACAACGTAAAAAAGTTGAGACAACTTCTAACGGTGGACCCCTCGGCTCGTGCGTCGATGAAGAACGCAGCAAACTGCGATACGTAGTGTGAATTGCAGAATTCCGTGAATCATCGAGTCTTTGAACGCAAATTGCGCCCTCGGTTTG…	Not available
Ha7	TGAACCTGCGGAAGGATCATTACCGTCTGTTCTCGGGGATCTCGATCCCTGCGATCCACCGTGCACTAGGCTGCGGCCCGCCACGCCGCGTCGGGGAGGTCGCCCTCGGGTCAAGAGGGTGACGCAAGTCGGCGAGAGAGATCCCCTCGCCGGCCTCCCCGTCGCGGAGGGCCGCAGTTCTCTATTCCATTTTTTTTTCCAACCTTGGAGTACCCCGACAGGGTGGCCTTCGGTTTCTCTTTCTTGGCAAAAAAAAAACCAAAAAAACGAAAAACAACTTCTAACGGTGGACCCCTCCGCTCGTGGGTCCATGAAGAACCCAACAAACTGGGATACGTAATGGGAATTGCAAAATTCCGTGAATCATCGAGTCTTTGAACCCAAATTGGGCCCTCGGGT…	Not available
